# Supplementary material for: Lipidomic Profiling of Ipsilateral Brain and Plasma after Celastrol Post-Treatment in Transient Middle Cerebral Artery Occlusion Mice Model
Source: MDPI journal article supplement (doi:10.3390/molecules26144124), 2021-07-07
Supplement: s1 [file s1]

**Table S1 Differential lipid species tMCAO/Sham in mouse plasma, according to significance evaluation and VIP values**

| ID        | Fold change | p.value | VIP   | Regulated | Metabolite                                                                        | Ion mode |
|-----------|-------------|---------|-------|-----------|-----------------------------------------------------------------------------------|----------|
| M130T32   | 2.198       | 0.008   | 3.127 | up        | L-Isoleucine                                                                      | -        |
| M185T29   | 4.731       | 0.030   | 3.248 | up        | Phosphodimethylethanolamine                                                       | -        |
| M185T32   | 2.454       | 0.018   | 2.887 | up        | N-[4'-hydroxy-(E)-cinnamoyl]-L-aspartic acid                                      | -        |
| M223T124  | 2.324       | 0.037   | 2.695 | up        | 5,8-Tetradecadienoic acid                                                         | -        |
| M239T77   | 2.956       | 0.011   | 2.890 | up        | L-Menthyl acetoacetate                                                            | -        |
| M249T137  | 2.136       | 0.029   | 2.722 | up        | Norambreinolide                                                                   | -        |
| M251T152  | 2.226       | 0.038   | 2.917 | up        | 7Z,10Z-Hexadecadienoic acid                                                       | -        |
| M275T149  | 2.087       | 0.040   | 1.808 | up        | 19-Norandrosterone                                                                | -        |
| M319T122  | 4.609       | 0.019   | 3.691 | up        | 5,6-Epoxy-8,11,14-eicosatrienoic acid                                             | -        |
| M327T172  | 2.332       | 0.027   | 2.991 | up        | Docosahexaenoic acid                                                              | -        |
| M327T32_2 | 2.064       | 0.012   | 2.641 | up        | 4-{1-hydroxy-3-[4-hydroxy-3-(3-methylbut-2-en-1-yl)phenyl]propyl}benzene-1,3-diol | -        |
| M343T118  | 4.668       | 0.049   | 3.224 | up        | Medroxyprogesterone                                                               | -        |
| M403T295  | 0.076       | 0.000   | 6.127 | down      | 3a,7a-Dihydroxy-5b-cholestane                                                     | -        |
| M425T201  | 0.448       | 0.013   | 2.566 | down      | 11,13-Dihydrotaraxinic acid glucosyl ester                                        | -        |
| M492T574  | 0.481       | 0.030   | 2.498 | down      | Ebrotidine                                                                        | -        |
| M524T160  | 2.019       | 0.034   | 2.468 | up        | LysoPE(0:0/22:6(4Z,7Z,10Z,13Z,16Z,19Z))                                           | -        |
| M537T197  | 2.056       | 0.043   | 2.332 | up        | FAHFA(16:0/9-O-18:0)                                                              | -        |
| M699T320  | 0.499       | 0.003   | 2.879 | down      | PE(16:1(9Z)/P-18:1(11Z))                                                          | -        |
| M725T380  | 0.470       | 0.000   | 3.136 | down      | TG(20:0/a-13:0/8:0)                                                               | -        |
| M729T345  | 0.435       | 0.001   | 3.071 | down      | PC(15:0/P-18:1(11Z))                                                              | -        |
| M737T210  | 4.830       | 0.008   | 3.936 | up        | PG(16:0/16:1(9Z))                                                                 | -        |
| M738T210  | 4.303       | 0.010   | 3.740 | up        | PE(18:4(6Z,9Z,12Z,15Z)/P-18:1(11Z))                                               | -        |

|          |       |       |       |      |                                                  |   |
|----------|-------|-------|-------|------|--------------------------------------------------|---|
| M739T210 | 3.985 | 0.009 | 3.722 | up   | PG(16:0/16:0)                                    | - |
| M763T304 | 3.696 | 0.024 | 3.333 | up   | PE(16:0/22:6(4Z,7Z,10Z,13Z,16Z,19Z))             | - |
| M764T212 | 2.189 | 0.007 | 2.451 | up   | PE(O-16:1(1Z)/22:6(4Z,7Z,10Z,13Z,16Z,19Z))       | - |
| M777T315 | 2.227 | 0.008 | 3.038 | up   | PC(14:0/22:6(4Z,7Z,10Z,13Z,16Z,19Z))             | - |
| M786T278 | 2.160 | 0.014 | 2.498 | up   | PC(15:0/20:3(5Z,8Z,11Z))                         | - |
| M789T308 | 2.548 | 0.009 | 3.029 | up   | PE(18:1(11Z)/22:6(4Z,7Z,10Z,13Z,16Z,19Z))        | - |
| M791T327 | 4.096 | 0.012 | 3.665 | up   | PC(15:0/22:6(4Z,7Z,10Z,13Z,16Z,19Z))             | - |
| M795T325 | 2.187 | 0.005 | 2.827 | up   | PC(15:0/22:4(7Z,10Z,13Z,16Z))                    | - |
| M814T565 | 0.423 | 0.013 | 3.199 | down | TG(14:0/15:0/20:3(5Z,8Z,11Z))                    | - |
| M818T335 | 3.541 | 0.025 | 2.907 | up   | 3-Decaprenyl-4-hydroxybenzoic acid               | - |
| M819T210 | 2.888 | 0.002 | 3.550 | up   | PC(18:4(6Z,9Z,12Z,15Z)/P-16:0)                   | - |
| M825T558 | 0.496 | 0.027 | 3.042 | down | PC(22:1(13Z)/P-18:1(11Z))                        | - |
| M830T304 | 2.442 | 0.026 | 2.748 | up   | PS(18:2(9Z,12Z)/22:6(4Z,7Z,10Z,13Z,16Z,19Z))     | - |
| M831T269 | 2.519 | 0.021 | 3.037 | up   | PG(18:0/18:0)                                    | - |
| M833T304 | 2.351 | 0.016 | 2.994 | up   | Momorcharaside A                                 | - |
| M834T277 | 2.811 | 0.003 | 3.316 | up   | PE(20:1(11Z)/22:6(4Z,7Z,10Z,13Z,16Z,19Z))        | - |
| M841T290 | 0.433 | 0.001 | 2.779 | down | PS(18:1(11Z)/22:2(13Z,16Z))                      | - |
| M845T304 | 2.785 | 0.025 | 2.997 | up   | Vinaginsenoside R2                               | - |
| M846T304 | 2.502 | 0.031 | 2.803 | up   | PS(18:3(9Z,12Z,15Z)/22:6(4Z,7Z,10Z,13Z,16Z,19Z)) | - |
| M850T478 | 0.402 | 0.003 | 3.074 | down | 3-demethylubiquinol-10                           | - |
| M859T327 | 2.451 | 0.023 | 2.915 | up   | PS(20:3(5Z,8Z,11Z)/22:5(4Z,7Z,10Z,13Z,16Z))      | - |
| M864T301 | 2.828 | 0.012 | 2.683 | up   | PE(20:5(5Z,8Z,11Z,14Z,17Z)/24:1(15Z))            | - |
| M874T327 | 2.395 | 0.045 | 2.508 | up   | PS(20:3(8Z,11Z,14Z)/22:6(4Z,7Z,10Z,13Z,16Z,19Z)) | - |
| M893T322 | 2.101 | 0.005 | 2.846 | up   | PE(DiMe(11,5)/MonoMe(13,5))                      | - |
| M894T322 | 2.056 | 0.004 | 2.815 | up   | PC(DiMe(11,3)/DiMe(11,5))                        | - |

|            |       |       |       |      |                                                               |   |
|------------|-------|-------|-------|------|---------------------------------------------------------------|---|
| M285T31    | 0.419 | 0.049 | 2.989 | down | Dimethylallylpyrophosphate                                    | + |
| M286T36    | 0.091 | 0.000 | 5.871 | down | 2-[(7-hydroxy-1-oxo-1H-isochromen-3-yl)formamido]acetic acid  | + |
| M328T74    | 2.288 | 0.043 | 2.267 | up   | (9E)-10-nitrooctadecenoic Acid                                | + |
| M332T563   | 0.497 | 0.038 | 2.399 | down | 2-Undecyl-4(1H)-quinolinone N-oxide                           | + |
| M346T170   | 2.005 | 0.041 | 2.791 | up   | Eicosapentaenoyl Ethanolamide                                 | + |
| M356T108   | 2.105 | 0.031 | 2.356 | up   | 14,15-DiHETrE                                                 | + |
| M370T122   | 2.917 | 0.007 | 3.191 | up   | O-(2-tetradecenoyl)carnitine                                  | + |
| M398T145   | 2.699 | 0.009 | 2.916 | up   | trans-Hexadec-2-enoyl carnitine                               | + |
| M401T164   | 3.055 | 0.010 | 3.149 | up   | 7-Ketocholesterol                                             | + |
| M426T170   | 4.488 | 0.002 | 4.030 | up   | Oleoylcarnitine                                               | + |
| M427T170   | 3.832 | 0.004 | 3.745 | up   | 4alpha-Formyl-4beta-methyl-5alpha-cholesta-8,24-dien-3beta-ol | + |
| M475T238_2 | 0.446 | 0.046 | 2.291 | down | Tyromycic acid                                                | + |
| M480T210   | 3.268 | 0.012 | 3.406 | up   | PC-M5'                                                        | + |
| M526T160   | 2.057 | 0.033 | 2.568 | up   | LysoPE(0:0/22:6(4Z,7Z,10Z,13Z,16Z,19Z))                       | + |
| M527T160   | 2.127 | 0.009 | 2.815 | up   | Desmosine                                                     | + |
| M528T160   | 2.204 | 0.027 | 2.803 | up   | CGP71422                                                      | + |
| M598T220   | 0.458 | 0.008 | 3.338 | down | beta-Doradecin                                                | + |
| M625T307   | 4.317 | 0.011 | 3.828 | up   | FAHFA(22:6(4Z,7Z,10Z,13Z,16Z,19Z)/9-O-18:2(10E,12Z))          | + |
| M683T340   | 2.031 | 0.008 | 2.727 | up   | DG(18:2(9Z,12Z)/22:6(4Z,7Z,10Z,13Z,16Z,19Z)/0:0)              | + |
| M701T320   | 0.299 | 0.001 | 4.093 | down | PE(16:1(9Z)/P-18:1(11Z))                                      | + |
| M702T320   | 0.427 | 0.000 | 3.066 | down | CE(DiMe(9,3))                                                 | + |
| M703T322   | 0.404 | 0.001 | 2.932 | down | PC(18:0/22:6(4Z,7Z,10Z,13Z,16Z,19Z))                          | + |
| M718T300   | 2.514 | 0.049 | 2.615 | up   | CE(20:1(11Z))                                                 | + |
| M727T322   | 0.403 | 0.005 | 3.076 | down | PE(18:2(9Z,12Z)/P-18:1(11Z))                                  | + |
| M728T277   | 2.779 | 0.014 | 2.988 | up   | N-hexadecanoylsphinganine-1-phosphocholine                    | + |

|            |       |       |       |      |                                              |   |
|------------|-------|-------|-------|------|----------------------------------------------|---|
| M728T323   | 0.370 | 0.002 | 3.351 | down | CE(11:1D3)                                   | + |
| M729T273   | 2.143 | 0.008 | 2.607 | up   | PC(14:0/18:3(6Z,9Z,12Z))                     | + |
| M729T278_1 | 2.798 | 0.021 | 2.924 | up   | SM(d18:0/16:0)                               | + |
| M729T321   | 2.199 | 0.004 | 2.737 | up   | CerP(d18:1/24:1(15Z))                        | + |
| M731T345   | 0.463 | 0.001 | 2.952 | down | PC(15:0/P-18:1(11Z))                         | + |
| M732T311   | 2.552 | 0.049 | 2.504 | up   | Ubiquinol 8                                  | + |
| M732T345   | 0.471 | 0.002 | 2.909 | down | PC(14:1(9Z)/P-18:1(11Z))                     | + |
| M733T311   | 2.287 | 0.046 | 2.408 | up   | SM(d18:1/18:0)                               | + |
| M734T311   | 2.228 | 0.046 | 2.426 | up   | DG(i-16:0/a-25:0/0:0)                        | + |
| M739T210   | 3.546 | 0.007 | 3.719 | up   | Glucosylceramide (d18:1/16:0)                | + |
| M740T210   | 3.012 | 0.004 | 3.557 | up   | SM(d18:0/16:1(9Z)(OH))                       | + |
| M743T316   | 0.352 | 0.004 | 3.631 | down | PC(16:1(9Z)/P-18:1(11Z))                     | + |
| M744T316   | 0.376 | 0.002 | 3.522 | down | CE(MonoMe(11,5))                             | + |
| M756T210   | 4.152 | 0.006 | 3.895 | up   | PA(18:1(11Z)/22:2(13Z,16Z))                  | + |
| M756T299   | 8.372 | 0.013 | 4.058 | up   | SM(d18:0/20:2(11Z,14Z))                      | + |
| M760T334   | 3.844 | 0.030 | 3.025 | up   | SM(d18:1/20:0)                               | + |
| M761T210   | 3.197 | 0.010 | 3.455 | up   | PS(16:0/18:2(9Z,12Z))                        | + |
| M765T304   | 2.967 | 0.020 | 3.211 | up   | PE(16:0/22:6(4Z,7Z,10Z,13Z,16Z,19Z))         | + |
| M766T304   | 2.911 | 0.018 | 3.202 | up   | PE-NMe(14:1(9Z)/22:6(4Z,7Z,10Z,13Z,16Z,19Z)) | + |
| M769T329   | 2.226 | 0.034 | 2.545 | up   | PC(15:0/20:4(5Z,8Z,11Z,14Z))                 | + |
| M773T320   | 0.401 | 0.002 | 3.191 | down | PE(20:4(5Z,8Z,11Z,14Z)/P-18:1(11Z))          | + |
| M782T210   | 2.796 | 0.000 | 3.686 | up   | PS(16:1(9Z)/20:4(5Z,8Z,11Z,14Z))             | + |
| M783T290   | 0.464 | 0.003 | 2.657 | down | PC(14:0/22:4(7Z,10Z,13Z,16Z))                | + |
| M784T226   | 2.045 | 0.020 | 2.470 | up   | PA(18:2(9Z,12Z)/24:1(15Z))                   | + |
| M785T287   | 2.427 | 0.014 | 3.021 | up   | PS(16:0/20:4(5Z,8Z,11Z,14Z))                 | + |

|          |       |       |       |      |                                                             |   |
|----------|-------|-------|-------|------|-------------------------------------------------------------|---|
| M785T290 | 0.178 | 0.000 | 4.436 | down | PC(14:0/20:0)                                               | + |
| M786T288 | 2.148 | 0.022 | 2.647 | up   | PE(DiMe(9,3)/DiMe(9,3))                                     | + |
| M787T304 | 2.312 | 0.030 | 2.714 | up   | PE(18:3(6Z,9Z,12Z)/22:6(4Z,7Z,10Z,13Z,16Z,19Z))             | + |
| M788T304 | 2.701 | 0.006 | 3.412 | up   | Narasin                                                     | + |
| M789T293 | 2.061 | 0.046 | 2.479 | up   | PE(18:2(9Z,12Z)/22:6(4Z,7Z,10Z,13Z,16Z,19Z))                | + |
| M791T308 | 3.131 | 0.009 | 3.418 | up   | PE(18:1(11Z)/22:6(4Z,7Z,10Z,13Z,16Z,19Z))                   | + |
| M792T308 | 2.872 | 0.007 | 3.344 | up   | PC(18:4(6Z,9Z,12Z,15Z)/18:4(6Z,9Z,12Z,15Z))                 | + |
| M793T327 | 3.322 | 0.019 | 3.331 | up   | PC(15:0/22:6(4Z,7Z,10Z,13Z,16Z,19Z))                        | + |
| M807T299 | 2.199 | 0.016 | 2.754 | up   | PC(16:0/22:6(4Z,7Z,10Z,13Z,16Z,19Z))                        | + |
| M811T325 | 2.086 | 0.006 | 2.735 | up   | PC(16:0/22:4(7Z,10Z,13Z,16Z))                               | + |
| M812T305 | 2.044 | 0.044 | 2.201 | up   | PC(15:0/22:5(4Z,7Z,10Z,13Z,16Z))                            | + |
| M813T308 | 2.498 | 0.042 | 2.731 | up   | PE(20:4(5Z,8Z,11Z,14Z)/22:6(4Z,7Z,10Z,13Z,16Z,19Z))         | + |
| M815T327 | 2.895 | 0.009 | 3.206 | up   | PE(20:3(5Z,8Z,11Z)/22:6(4Z,7Z,10Z,13Z,16Z,19Z))             | + |
| M816T327 | 3.675 | 0.004 | 3.801 | up   | PE-NMe(18:4(6Z,9Z,12Z,15Z)/22:6(4Z,7Z,10Z,13Z,16Z,19Z))     | + |
| M822T310 | 2.263 | 0.019 | 2.748 | up   | PC(16:1(9Z)/22:6(4Z,7Z,10Z,13Z,16Z,19Z))                    | + |
| M827T329 | 2.213 | 0.043 | 2.542 | up   | PE(22:0/P-18:0)                                             | + |
| M837T322 | 2.391 | 0.010 | 3.102 | up   | PC(18:0/22:5(4Z,7Z,10Z,13Z,16Z))                            | + |
| M837T327 | 3.513 | 0.010 | 3.968 | up   | PE(22:6(4Z,7Z,10Z,13Z,16Z,19Z)/22:6(4Z,7Z,10Z,13Z,16Z,19Z)) | + |
| M838T323 | 2.737 | 0.029 | 3.018 | up   | PE(20:0/22:6(4Z,7Z,10Z,13Z,16Z,19Z))                        | + |
| M844T310 | 2.020 | 0.001 | 3.067 | up   | PC(18:4(6Z,9Z,12Z,15Z)/22:6(4Z,7Z,10Z,13Z,16Z,19Z))         | + |
| M859T322 | 2.326 | 0.007 | 3.091 | up   | PC(20:2(11Z,14Z)/22:6(4Z,7Z,10Z,13Z,16Z,19Z))               | + |
| M861T288 | 2.026 | 0.022 | 2.791 | up   | PG(18:0/22:6(4Z,7Z,10Z,13Z,16Z,19Z))                        | + |
| M865T299 | 2.055 | 0.024 | 2.602 | up   | 3-O-Sulfogalactosylceramide (d18:1/22:0)                    | + |
| M866T299 | 2.063 | 0.017 | 2.692 | up   | All trans decaprenyl diphosphate                            | + |
| M883T275 | 0.436 | 0.005 | 2.989 | down | PC(22:4(7Z,10Z,13Z,16Z)/22:6(4Z,7Z,10Z,13Z,16Z,19Z))        | + |

|          |       |       |       |    |                                                                         |   |
|----------|-------|-------|-------|----|-------------------------------------------------------------------------|---|
| M893T323 | 2.532 | 0.009 | 3.156 | up | 3-O-Sulfogalactosylceramide (d18:1/24:0)                                | + |
| M894T323 | 2.730 | 0.008 | 3.290 | up | TG(18:3(6Z,9Z,12Z)/18:4(6Z,9Z,12Z,15Z)/18:3(6Z,9Z,12Z))                 | + |
| M906T367 | 2.559 | 0.010 | 3.313 | up | Galabiosylceramide (d18:1/9Z-18:1)                                      | + |
| M912T299 | 2.025 | 0.008 | 2.657 | up | PI(18:0/22:6(4Z,7Z,10Z,13Z,16Z,19Z))                                    | + |
| M920T323 | 2.398 | 0.023 | 2.953 | up | TG(18:4(6Z,9Z,12Z,15Z)/22:6(4Z,7Z,10Z,13Z,16Z,19Z)/18:4(6Z,9Z,12Z,15Z)) | + |
| M921T323 | 3.364 | 0.002 | 3.675 | up | PC(o-22:0/22:3(10Z,13Z,16Z))                                            | + |

**Table S2 Differential lipid species Cela/tMCAO in mouse plasma, according to significance evaluation and VIP values**

| ID       | Fold change | p.value | VIP   | Regulated | Metabolite                                  | Ion mode |
|----------|-------------|---------|-------|-----------|---------------------------------------------|----------|
| M161T28  | 0.393       | 0.007   | 3.273 | down      | 2-Methyl-1-methylthio-2-butene              | -        |
| M179T29  | 0.295       | 0.003   | 3.902 | down      | 5-Hydroxykynurenamine                       | -        |
| M179T32  | 0.351       | 0.001   | 3.910 | down      | Purine                                      | -        |
| M243T29  | 2.066       | 0.041   | 2.547 | up        | Nopalinic acid                              | -        |
| M299T136 | 2.333       | 0.025   | 3.069 | up        | (R)-3-Hydroxy-Octadecanoic acid             | -        |
| M326T28  | 0.290       | 0.043   | 3.377 | down      | Diloxanide                                  | -        |
| M426T564 | 2.125       | 0.023   | 3.083 | up        | Trospium chloride                           | -        |
| M436T184 | 2.317       | 0.001   | 3.379 | up        | PE(P-16:0e/0:0)                             | -        |
| M517T251 | 3.023       | 0.048   | 3.272 | up        | Blumenol C O-[rhamnosyl-(1->6)-glucoside]   | -        |
| M858T256 | 0.329       | 0.001   | 4.189 | down      | PI(16:0/20:4(5Z,8Z,11Z,14Z))                | -        |
| M859T256 | 0.344       | 0.001   | 4.055 | down      | PS(20:3(5Z,8Z,11Z)/22:5(4Z,7Z,10Z,13Z,16Z)) | -        |
| M860T260 | 0.481       | 0.014   | 2.877 | down      | PI(16:0/20:3(5Z,8Z,11Z))                    | -        |
| M864T301 | 2.156       | 0.014   | 2.802 | up        | PE(20:5(5Z,8Z,11Z,14Z,17Z)/24:1(15Z))       | -        |
| M866T314 | 2.144       | 0.034   | 3.338 | up        | PE(20:4(5Z,8Z,11Z,14Z)/24:1(15Z))           | -        |

|          |       |       |       |      |                                                                                                                                                                |   |
|----------|-------|-------|-------|------|----------------------------------------------------------------------------------------------------------------------------------------------------------------|---|
| M867T305 | 0.450 | 0.026 | 3.554 | down | PS(18:3(6Z,9Z,12Z)/24:1(15Z))                                                                                                                                  | - |
| M872T265 | 0.459 | 0.003 | 3.494 | down | Azaspiracid 2                                                                                                                                                  | - |
| M884T260 | 0.404 | 0.008 | 3.529 | down | PI(16:0/22:5(4Z,7Z,10Z,13Z,16Z))                                                                                                                               | - |
| M885T260 | 0.401 | 0.003 | 3.763 | down | PS(22:4(7Z,10Z,13Z,16Z)/22:5(4Z,7Z,10Z,13Z,16Z))                                                                                                               | - |
| M886T259 | 0.422 | 0.006 | 3.420 | down | PI(16:0/22:4(10Z,13Z,16Z,19Z))                                                                                                                                 | - |
| M887T276 | 0.307 | 0.000 | 4.641 | down | PS(22:2(13Z,16Z)/22:6(4Z,7Z,10Z,13Z,16Z,19Z))                                                                                                                  | - |
| M888T276 | 0.351 | 0.000 | 4.270 | down | PI(16:0/22:3(10Z,13Z,16Z))                                                                                                                                     | - |
| M889T287 | 0.460 | 0.005 | 3.245 | down | PS(22:2(13Z,16Z)/22:5(4Z,7Z,10Z,13Z,16Z))                                                                                                                      | - |
| M935T299 | 0.426 | 0.013 | 3.061 | down | PS(DiMe(11,5)/MonoMe(13,5))                                                                                                                                    | - |
| M377T569 | 2.228 | 0.022 | 2.824 | up   | MG(0:0/18:2(9Z,12Z)/0:0)                                                                                                                                       | + |
| M426T61  | 4.941 | 0.027 | 3.947 | up   | 3a,7a,12b-Trihydroxy-5b-cholanoic acid                                                                                                                         | + |
| M430T167 | 2.296 | 0.011 | 2.711 | up   | 5-(2,3-Dihydroxy-3-methylbutyl)-4-(3,4-epoxy-4-methylpentanoyl)-3,4-dihydroxy-2-isopentanoyl-2-cyclopenten-1-one                                               | + |
| M435T568 | 2.835 | 0.019 | 3.102 | up   | MG(0:0/22:1(13Z)/0:0)                                                                                                                                          | + |
| M519T567 | 0.485 | 0.005 | 2.574 | down | {[4-(5,7-dihydroxy-4-oxo-3,4-dihydro-2H-1-benzopyran-2-yl)-5-hydroxy-13,13-dimethyl-8-oxatetracyclo[7.4.1.0tetradeca-2(7),3,5-trien-9-yl]methoxy}sulfonic acid | + |
| M600T256 | 0.341 | 0.001 | 3.982 | down | Cohibin C                                                                                                                                                      | + |
| M610T569 | 2.311 | 0.005 | 3.188 | up   | 3,4,5-trihydroxy-6-({5-hydroxy-4-oxo-2-phenyl-6-[3,4,5-trihydroxy-6-(hydroxymethyl)oxan-2-yl]-4H-chromen-7-yl}oxy)oxane-2-carboxylic acid                      | + |
| M648T573 | 2.242 | 0.043 | 2.520 | up   | PE(14:1(9Z)/15:0)                                                                                                                                              | + |
| M668T276 | 0.408 | 0.000 | 3.819 | down | DG(18:1(11Z)/22:6(4Z,7Z,10Z,13Z,16Z,19Z)/0:0)                                                                                                                  | + |
| M836T303 | 0.481 | 0.029 | 3.071 | down | PE(20:1(11Z)/22:6(4Z,7Z,10Z,13Z,16Z,19Z))                                                                                                                      | + |
| M861T256 | 0.378 | 0.002 | 3.647 | down | PS(18:0/22:5(7Z,10Z,13Z,16Z,19Z))                                                                                                                              | + |
| M877T256 | 0.344 | 0.001 | 3.894 | down | PC(20:4(5Z,8Z,11Z,14Z)/22:6(4Z,7Z,10Z,13Z,16Z,19Z))                                                                                                            | + |
| M878T256 | 0.356 | 0.001 | 3.858 | down | PS(20:3(5Z,8Z,11Z)/22:5(4Z,7Z,10Z,13Z,16Z))                                                                                                                    | + |

|          |       |       |       |      |                                                             |   |
|----------|-------|-------|-------|------|-------------------------------------------------------------|---|
| M879T260 | 0.440 | 0.024 | 2.644 | down | PC(22:6(4Z,7Z,10Z,13Z,16Z,19Z)/22:6(4Z,7Z,10Z,13Z,16Z,19Z)) | + |
| M882T508 | 2.533 | 0.006 | 3.110 | up   | PA(22:0/a-25:0)                                             | + |
| M890T276 | 0.381 | 0.001 | 3.744 | down | PI(16:0/20:0)                                               | + |
| M903T256 | 0.388 | 0.001 | 3.672 | down | Asparagoside D                                              | + |
| M903T260 | 0.358 | 0.004 | 3.854 | down | PC(22:5(4Z,7Z,10Z,13Z,16Z)/22:6(4Z,7Z,10Z,13Z,16Z,19Z))     | + |
| M904T256 | 0.439 | 0.001 | 3.533 | down | PIP(16:1(9Z)/16:1(9Z))                                      | + |
| M904T260 | 0.414 | 0.008 | 3.382 | down | All trans decaprenyl diphosphate                            | + |
| M905T259 | 0.457 | 0.011 | 3.019 | down | PC(22:4(7Z,10Z,13Z,16Z)/22:6(4Z,7Z,10Z,13Z,16Z,19Z))        | + |
| M907T276 | 0.328 | 0.000 | 4.194 | down | PC(22:4(7Z,10Z,13Z,16Z)/22:5(4Z,7Z,10Z,13Z,16Z))            | + |
| M909T260 | 0.415 | 0.003 | 3.431 | down | Chlorophyll b                                               | + |
| M909T282 | 0.488 | 0.003 | 3.045 | down | PC(22:2(13Z,16Z)/22:6(4Z,7Z,10Z,13Z,16Z,19Z))               | + |
| M930T260 | 0.464 | 0.010 | 3.088 | down | Araliasaponin I                                             | + |
| M931T313 | 0.348 | 0.001 | 4.088 | down | 3-O-Sulfogalactosylceramide (d18:1/24:0)                    | + |
| M932T276 | 0.386 | 0.000 | 3.973 | down | Hoduloside VII                                              | + |
| M933T276 | 0.412 | 0.000 | 3.809 | down | PIP(16:0/18:2(9Z,12Z))                                      | + |
| M934T275 | 0.475 | 0.001 | 3.335 | down | Notoginsenoside R1                                          | + |
| M988T256 | 0.452 | 0.001 | 3.391 | down | Basellasaponin A                                            | + |
| M989T276 | 0.493 | 0.001 | 3.366 | down | Phytolaccasaponin B                                         | + |

**Table S3 Differential lipid species tMCAO/Sham in mouse brain, according to significance evaluation and VIP values**

| ID      | Fold change | p.value | VIP   | Regulated | Metabolite                   | Ion mode |
|---------|-------------|---------|-------|-----------|------------------------------|----------|
| M103T33 | 3.075       | 0.002   | 3.239 | up        | 2-Hydroxybutyric acid        | -        |
| M134T33 | 0.485       | 0.033   | 2.646 | down      | D-erythro-L-galacto-Nonulose | -        |

|            |       |       |       |      |                                                                                 |   |
|------------|-------|-------|-------|------|---------------------------------------------------------------------------------|---|
| M147T29_1  | 3.720 | 0.001 | 3.671 | up   | 3-(4-hydroxy-3,5-dimethoxyphenyl)prop-2-enoic acid                              | - |
| M171T30    | 3.002 | 0.001 | 3.352 | up   | Ribothymidine                                                                   | - |
| M173T35    | 2.093 | 0.040 | 2.705 | up   | L-Arginine                                                                      | - |
| M174T26    | 0.196 | 0.000 | 4.033 | down | N-Acetyl-L-aspartic acid                                                        | - |
| M174T28    | 0.287 | 0.011 | 3.977 | down | 2-ethyl-1,5-dimethyl-3,3-diphenylpyrrolinium (EDDP)                             | - |
| M174T37    | 0.086 | 0.009 | 3.931 | down | D-Erythroascorbic acid 1'-a-D-xylopyranoside                                    | - |
| M175T28    | 0.450 | 0.029 | 2.860 | down | Allantoic acid                                                                  | - |
| M182T29_1  | 2.024 | 0.000 | 2.726 | up   | Saccharin                                                                       | - |
| M190T28    | 2.694 | 0.000 | 3.293 | up   | Brassilexin                                                                     | - |
| M195T29    | 2.729 | 0.002 | 2.680 | up   | 5-(4,7-dihydroxy-6-methoxy-3,4-dihydro-2H-1-benzopyran-3-yl)benzene-1,2,4-triol | - |
| M213T30    | 2.024 | 0.016 | 2.341 | up   | N-desmethyalmotriptan                                                           | - |
| M223T123   | 2.048 | 0.009 | 2.426 | up   | 5,8-Tetradecadienoic acid                                                       | - |
| M226T513   | 2.524 | 0.003 | 3.065 | up   | Nitroglycerin                                                                   | - |
| M239T76    | 2.572 | 0.044 | 2.365 | up   | L-Menthyl acetoacetate                                                          | - |
| M249T137   | 2.284 | 0.003 | 2.554 | up   | Norambreinolide                                                                 | - |
| M251T152   | 2.003 | 0.007 | 2.331 | up   | 7Z,10Z-Hexadecadienoic acid                                                     | - |
| M267T243   | 2.231 | 0.033 | 2.273 | up   | Stearaldehyde                                                                   | - |
| M277T163   | 2.353 | 0.006 | 2.557 | up   | Alpha-Linolenic acid                                                            | - |
| M277T29    | 2.193 | 0.022 | 2.311 | up   | Glycerol 1-propanoate diacetate                                                 | - |
| M277T31_1  | 2.262 | 0.002 | 2.808 | up   | Alcophosphamide                                                                 | - |
| M282T29    | 0.476 | 0.015 | 2.610 | down | Glutaminyllhistidine                                                            | - |
| M286T127   | 0.414 | 0.001 | 3.059 | down | N-[2-(4-Prenyloxyphenyl)ethyl]tiglamide                                         | - |
| M286T28    | 4.756 | 0.000 | 4.382 | up   | Rutaecarpine                                                                    | - |
| M292T561   | 3.141 | 0.000 | 3.394 | up   | Nonivamide                                                                      | - |
| M297T570_2 | 3.567 | 0.017 | 2.873 | up   | 3-Oxoctadecanoic acid                                                           | - |

|           |        |       |       |      |                                                                                       |   |
|-----------|--------|-------|-------|------|---------------------------------------------------------------------------------------|---|
| M298T192  | 4.204  | 0.012 | 3.263 | up   | Sphingosine                                                                           | - |
| M305T32   | 5.343  | 0.000 | 4.195 | up   | Pelargonidin                                                                          | - |
| M314T152  | 0.449  | 0.000 | 2.997 | down | 4-Oxoretinal                                                                          | - |
| M315T173  | 2.422  | 0.026 | 2.184 | up   | Pregnenolone                                                                          | - |
| M317T105  | 2.240  | 0.012 | 2.529 | up   | Leukotriene A4                                                                        | - |
| M323T30_2 | 2.218  | 0.030 | 2.436 | up   | Mulberrofuran S                                                                       | - |
| M324T198  | 3.017  | 0.021 | 2.772 | up   | N-Oleoylethanolamine                                                                  | - |
| M326T217  | 12.217 | 0.002 | 4.644 | up   | Stearoylethanolamide                                                                  | - |
| M341T29   | 3.079  | 0.001 | 3.410 | up   | 2-O-alpha-D-Galactopyranosyl-1-deoxynojirimycin                                       | - |
| M352T221  | 2.689  | 0.040 | 2.543 | up   | Docosadienoate (22:2n6)                                                               | - |
| M359T192  | 4.187  | 0.012 | 3.364 | up   | Tetracosatetraenoic acid (24:4n-6)                                                    | - |
| M360T198  | 3.396  | 0.033 | 2.841 | up   | 16b-Hydroxystanazolol                                                                 | - |
| M374T202  | 3.632  | 0.007 | 3.244 | up   | Adrenoyl ethanolamide                                                                 | - |
| M378T29_2 | 2.025  | 0.006 | 2.338 | up   | Chondroitin                                                                           | - |
| M378T566  | 0.417  | 0.002 | 2.854 | down | 2-(Arabinosylamino)-3-(glucosylamino)propanenitrile                                   | - |
| M381T29   | 0.445  | 0.008 | 2.718 | down | Eletriptan                                                                            | - |
| M384T198  | 3.309  | 0.017 | 3.015 | up   | Pentadecanoylcarnitine                                                                | - |
| M385T198  | 3.191  | 0.011 | 2.798 | up   | 1-Phenyl-1,3-eicosanedione                                                            | - |
| M386T217  | 12.964 | 0.002 | 4.777 | up   | Diethylhexyl adipate                                                                  | - |
| M387T217  | 9.191  | 0.002 | 4.501 | up   | 3-Hydroxy-1-phenyl-1-eicosanone                                                       | - |
| M395T29   | 0.384  | 0.003 | 3.001 | down | Chondroitin                                                                           | - |
| M401T243  | 2.144  | 0.045 | 2.198 | up   | Bis(2-methylundecan-2-yl) Disulfide                                                   | - |
| M410T206  | 2.274  | 0.028 | 2.345 | up   | DG(i-20:0/a-25:0/0:0)                                                                 | - |
| M419T352  | 2.018  | 0.049 | 1.987 | up   | 3-[(1E)-1-{4-[2-(dimethylamino)ethoxy]phenyl}-1-(3-hydroxyphenyl)but-1-en-2-yl]phenol | - |
| M429T28   | 6.110  | 0.008 | 4.032 | up   | 3-phenyl-1-[2,4,6-trihydroxy-3,5-bis(3-methylbut-2-en-1-yl)phenyl]propan-1-one        | - |

|          |        |       |       |      |                                                                                                                                                                                                         |   |
|----------|--------|-------|-------|------|---------------------------------------------------------------------------------------------------------------------------------------------------------------------------------------------------------|---|
| M430T29  | 0.421  | 0.002 | 2.690 | down | Ochratoxin C                                                                                                                                                                                            | - |
| M431T565 | 2.686  | 0.000 | 2.815 | up   | 13'-Hydroxy-gamma-tocopherol                                                                                                                                                                            | - |
| M434T202 | 5.177  | 0.009 | 3.449 | up   | 11'-Carboxy-alpha-chromanol                                                                                                                                                                             | - |
| M435T202 | 2.022  | 0.048 | 2.307 | up   | Demethylphyloquinone                                                                                                                                                                                    | - |
| M447T295 | 0.394  | 0.018 | 2.425 | down | 4-Hydroxy-5-(3',4',5'-trihydroxyphenyl)-valeric acid-O-methyl-O-glucuronide                                                                                                                             | - |
| M449T296 | 0.411  | 0.017 | 2.432 | down | Flufenprox                                                                                                                                                                                              | - |
| M465T29  | 3.511  | 0.002 | 3.534 | up   | Corchorusoside E                                                                                                                                                                                        | - |
| M466T221 | 2.114  | 0.030 | 2.155 | up   | Arnamiol                                                                                                                                                                                                | - |
| M555T191 | 3.994  | 0.029 | 3.006 | up   | Cer(t18:0/16:0)                                                                                                                                                                                         | - |
| M581T196 | 8.038  | 0.008 | 4.002 | up   | FAHFA(18:1(9Z)/12-O-18:0)                                                                                                                                                                               | - |
| M611T217 | 16.249 | 0.004 | 4.865 | up   | Ethylene glycol distearate                                                                                                                                                                              | - |
| M671T296 | 0.446  | 0.044 | 2.034 | down | 4-[N-(p-Coumaroyl)serotonin-4"-yl]-N-feruloylserotonin                                                                                                                                                  | - |
| M681T296 | 0.446  | 0.028 | 2.181 | down | Myricanol 5-laminaribioside                                                                                                                                                                             | - |
| M682T296 | 0.470  | 0.025 | 2.149 | down | 6- {[2-(2,4-dihydroxyphenyl)-3-(3,7-dimethylocta-2,6-dien-1-yl)-7-hydroxy-8-(3-methylbut-2-en-1-yl)-4-oxo-4H-chromen-6-yl]oxy}-3,4,5-trihydroxyoxane-2-carboxylic acid                                  | - |
| M697T295 | 0.399  | 0.025 | 2.332 | down | 3,4,5-trihydroxy-6- {[3-(2-methyl-1,3-thiazol-4-yl)-2-[(16R)-5,7,11-trihydroxy-8,8,10,12,16-pentamethyl-9-oxo-17-oxa-4-azabicyclo[14.1.0]heptadec-4-en-3-yl]prop-2-en-1-yl]oxy} oxane-2-carboxylic acid | - |
| M711T296 | 0.489  | 0.029 | 2.060 | down | Nomilinic acid 17-glucoside                                                                                                                                                                             | - |
| M729T284 | 0.388  | 0.013 | 2.761 | down | PC(14:0/18:2(9Z,12Z))                                                                                                                                                                                   | - |
| M755T287 | 0.398  | 0.030 | 2.454 | down | PC(14:0/20:3(5Z,8Z,11Z))                                                                                                                                                                                | - |
| M757T303 | 0.450  | 0.002 | 2.706 | down | PC(14:0/20:2(11Z,14Z))                                                                                                                                                                                  | - |
| M775T268 | 0.358  | 0.006 | 2.880 | down | PC(14:1(9Z)/22:6(4Z,7Z,10Z,13Z,16Z,19Z))                                                                                                                                                                | - |
| M779T300 | 0.405  | 0.008 | 2.846 | down | Ganglioside GM1 (d18:1/14:0)                                                                                                                                                                            | - |
| M791T244 | 2.034  | 0.008 | 2.563 | up   | PG(16:1(9Z)/22:6(4Z,7Z,10Z,13Z,16Z,19Z))                                                                                                                                                                | - |
| M791T259 | 0.304  | 0.004 | 3.327 | down | CL(18:0/18:0/18:0/22:5(4Z,7Z,10Z,13Z,16Z))                                                                                                                                                              | - |

|          |       |       |       |      |                                                                                                                                                                                                                              |   |
|----------|-------|-------|-------|------|------------------------------------------------------------------------------------------------------------------------------------------------------------------------------------------------------------------------------|---|
| M797T414 | 0.433 | 0.002 | 2.582 | down | PC(20:1(11Z)/P-18:1(11Z))                                                                                                                                                                                                    | - |
| M799T258 | 0.444 | 0.004 | 2.887 | down | 3,4,5-trihydroxy-6-{[7-hydroxy-2-(3-hydroxy-4-methoxyphenyl)-4-oxo-3,8-bis[3,4,5-trihydroxy-6-(hydroxymethyl)oxan-2-yl]-4H-chromen-5-yl]oxy}oxane-2-carboxylic acid                                                          | - |
| M800T258 | 0.444 | 0.004 | 2.884 | down | Delphinidin 3-lathyroside 5-(6-acetylglucoside)                                                                                                                                                                              | - |
| M801T271 | 0.448 | 0.019 | 2.557 | down | PC(18:3(6Z,9Z,12Z)/20:5(5Z,8Z,11Z,14Z,17Z))                                                                                                                                                                                  | - |
| M803T288 | 0.388 | 0.018 | 2.674 | down | PC(16:1(9Z)/22:6(4Z,7Z,10Z,13Z,16Z,19Z))                                                                                                                                                                                     | - |
| M804T304 | 0.367 | 0.013 | 2.849 | down | Dulcoside A                                                                                                                                                                                                                  | - |
| M805T288 | 0.409 | 0.010 | 2.723 | down | Lactosylceramide (d18:1/12:0)                                                                                                                                                                                                | - |
| M805T304 | 0.364 | 0.015 | 2.982 | down | Licoricesaponin C2                                                                                                                                                                                                           | - |
| M817T262 | 0.423 | 0.005 | 2.776 | down | Majoroside F2                                                                                                                                                                                                                | - |
| M828T414 | 0.385 | 0.001 | 2.771 | down | PC(16:1(9Z)/22:2(13Z,16Z))                                                                                                                                                                                                   | - |
| M830T258 | 0.452 | 0.001 | 2.861 | down | Alatanin 2                                                                                                                                                                                                                   | - |
| M832T414 | 0.459 | 0.003 | 2.567 | down | PC(22:6(4Z,7Z,10Z,13Z,16Z,19Z)/P-18:1(11Z))                                                                                                                                                                                  | - |
| M833T414 | 0.460 | 0.000 | 2.675 | down | PS(15:0/24:0)                                                                                                                                                                                                                | - |
| M854T293 | 0.357 | 0.012 | 3.067 | down | CDP-DG(a-13:0/i-12:0)                                                                                                                                                                                                        | - |
| M854T309 | 0.407 | 0.030 | 2.895 | down | Licoricesaponin G2                                                                                                                                                                                                           | - |
| M858T569 | 2.375 | 0.003 | 2.543 | up   | 6-{6-[6-(2,4-dihydroxyphenyl)-2-{4-[(E)-2-(2,4-dihydroxyphenyl)ethenyl]-2,6-dihydroxyphenyl}-4-(hydroxymethyl)cyclohex-3-ene-1-carbonyl]-3-hydroxy-2-(3-methylbut-2-en-1-yl)phenoxy}-3,4,5-trihydroxyoxane-2-carboxylic acid | - |
| M864T440 | 0.411 | 0.002 | 2.678 | down | Ubiquinol-10                                                                                                                                                                                                                 | - |
| M896T440 | 0.399 | 0.000 | 2.994 | down | TG(18:3(6Z,9Z,12Z)/20:5(5Z,8Z,11Z,14Z,17Z)/18:3(6Z,9Z,12Z))                                                                                                                                                                  | - |
| M910T300 | 3.209 | 0.000 | 3.678 | up   | PS(DiMe(11,3)/DiMe(11,5))                                                                                                                                                                                                    | - |
| M919T393 | 2.251 | 0.001 | 2.683 | up   | Phaseoloside D                                                                                                                                                                                                               | - |
| M929T313 | 6.283 | 0.000 | 4.713 | up   | PI(18:0/22:5(4Z,7Z,10Z,13Z,16Z))                                                                                                                                                                                             | - |
| M935T304 | 2.460 | 0.001 | 3.224 | up   | PS(DiMe(11,5)/MonoMe(13,5))                                                                                                                                                                                                  | - |

|           |        |       |       |      |                                                                                                        |   |
|-----------|--------|-------|-------|------|--------------------------------------------------------------------------------------------------------|---|
| M938T323  | 2.590  | 0.000 | 3.353 | up   | PS(DiMe(11,3)/DiMe(13,5))                                                                              | - |
| M953T312  | 6.998  | 0.000 | 4.899 | up   | 1,2-Di-(9Z,12Z,15Z-octadecatrienoyl)-3-(Galactosyl-alpha-1-6-Galactosyl-beta-1)-glycerol               | - |
| M133T101  | 5.876  | 0.025 | 3.501 | up   | Eplerenone                                                                                             | + |
| M145T34   | 2.330  | 0.016 | 3.327 | up   | 2-Bromoacetaldehyde                                                                                    | + |
| M152T30   | 0.469  | 0.009 | 2.809 | down | (S)-Ureidoglycolic acid                                                                                | + |
| M165T33   | 0.385  | 0.013 | 3.013 | down | 5-Ethyl-3-hydroxy-4-methyl-2(5H)-furanone                                                              | + |
| M175T36   | 2.089  | 0.000 | 3.063 | up   | L-Arginine                                                                                             | + |
| M185T30   | 2.728  | 0.000 | 3.575 | up   | N-(3-acetamidopropyl)pyrrolidin-2-one                                                                  | + |
| M194T33   | 5.824  | 0.000 | 4.404 | up   | 4-Phenylpyridine                                                                                       | + |
| M236T34   | 0.291  | 0.000 | 3.898 | down | L-Aspartyl-4-phosphate                                                                                 | + |
| M246T30   | 2.055  | 0.009 | 2.523 | up   | Dezocine                                                                                               | + |
| M246T76   | 0.386  | 0.000 | 3.433 | down | S-3-oxodecanoyl cysteamine                                                                             | + |
| M259T33   | 2.266  | 0.015 | 2.514 | up   | 2,4-Dichlorophenoxyacetic acid                                                                         | + |
| M285T32   | 12.763 | 0.007 | 4.868 | up   | Dimethylallylpyrophosphate                                                                             | + |
| M286T38   | 4.281  | 0.000 | 3.882 | up   | 2-[(7-hydroxy-1-oxo-1H-isochromen-3-yl)formamido]acetic acid                                           | + |
| M288T37_1 | 2.147  | 0.004 | 2.551 | up   | 2-{[hydroxy(4-methoxy-1-benzofuran-5-yl)methylidene]amino}acetic acid                                  | + |
| M289T29   | 2.543  | 0.026 | 2.910 | up   | Methionyl-Threonine                                                                                    | + |
| M290T35   | 0.484  | 0.001 | 2.802 | down | Tiglylcarnitine                                                                                        | + |
| M299T237  | 2.659  | 0.027 | 2.601 | up   | Artemether                                                                                             | + |
| M299T38   | 0.148  | 0.016 | 3.989 | down | LysoPA(8:0/0:0)                                                                                        | + |
| M300T192  | 4.840  | 0.013 | 3.524 | up   | Sphingosine                                                                                            | + |
| M300T38   | 0.132  | 0.009 | 4.171 | down | Arabinopyranobiose                                                                                     | + |
| M301T29   | 2.736  | 0.000 | 3.561 | up   | (x)-2-Heptanol glucoside                                                                               | + |
| M302T30   | 2.350  | 0.001 | 3.213 | up   | Sibutramine                                                                                            | + |
| M307T35   | 53.895 | 0.023 | 5.220 | up   | (1aalpha,2beta,3alpha,11calpha)-1a,2,3,11c-Tetrahydro-6,11-dimethylbenzo[6,7]phenanthro[3,4-b]oxirene- | + |

| 2,3-diol   |        |       |       |      |                                                                                      |   |
|------------|--------|-------|-------|------|--------------------------------------------------------------------------------------|---|
| M316T153   | 0.475  | 0.000 | 3.071 | down | 4-Oxoretinal                                                                         | + |
| M319T40    | 2.167  | 0.002 | 3.157 | up   | Leukotriene A4                                                                       | + |
| M326T198   | 3.770  | 0.018 | 3.458 | up   | N-Oleoylethanolamine                                                                 | + |
| M328T217   | 17.732 | 0.003 | 5.454 | up   | Stearoylethanolamide                                                                 | + |
| M343T243   | 2.131  | 0.031 | 2.485 | up   | MG(P-18:0e/0:0/0:0)                                                                  | + |
| M345T242   | 2.028  | 0.041 | 2.377 | up   | MG(18:0e/0:0/0:0)                                                                    | + |
| M351T33    | 3.390  | 0.004 | 3.382 | up   | Penicillin V                                                                         | + |
| M356T241   | 3.451  | 0.008 | 3.479 | up   | Erucic acid                                                                          | + |
| M356T31    | 4.848  | 0.000 | 4.647 | up   | Robenidine                                                                           | + |
| M360T80    | 2.224  | 0.001 | 3.014 | up   | 2-Hydroxy-lauroylcarnitine                                                           | + |
| M367T224   | 2.471  | 0.011 | 2.893 | up   | Dihomo-gamma-Linolenoyl ethanolamide                                                 | + |
| M400T164   | 2.181  | 0.000 | 2.854 | up   | L-Palmitoylcarnitine                                                                 | + |
| M400T268   | 2.072  | 0.042 | 2.183 | up   | Pentacosanoic acid                                                                   | + |
| M401T164   | 2.077  | 0.000 | 2.776 | up   | 7-Ketocholesterol                                                                    | + |
| M402T33    | 2.269  | 0.015 | 2.906 | up   | S-(1,2-Dichlorovinyl)glutathione                                                     | + |
| M416T144   | 2.728  | 0.001 | 3.427 | up   | 3-Hydroxyhexadecanoylcarnitine                                                       | + |
| M428T189   | 2.465  | 0.001 | 3.170 | up   | Stearoylcarnitine                                                                    | + |
| M429T189   | 2.137  | 0.000 | 2.942 | up   | Cholesteryl acetate                                                                  | + |
| M437T33_1  | 2.382  | 0.000 | 3.278 | up   | [2-hydroxy-5-(3,5,6,7-tetrahydroxy-4-oxo-4H-chromen-2-yl)phenyl]oxidanesulfonic acid | + |
| M442T152   | 2.374  | 0.001 | 3.096 | up   | 3-Hydroxy-11Z-octadecenoylcarnitine                                                  | + |
| M477T230_1 | 0.475  | 0.007 | 2.429 | down | Ubiquinone-4                                                                         | + |
| M523T574   | 2.411  | 0.040 | 2.527 | up   | Tuftsia                                                                              | + |
| M584T567   | 2.805  | 0.001 | 3.320 | up   | N-(2R-Hydroxyhexadecanoyl)-2S-amino-9-methyl-4E,8E-octadecadiene-1,3R-diol           | + |
| M671T258   | 0.380  | 0.001 | 3.661 | down | Bromocriptine                                                                        | + |

|            |       |       |       |      |                                                                                     |   |
|------------|-------|-------|-------|------|-------------------------------------------------------------------------------------|---|
| M672T258_2 | 0.471 | 0.001 | 3.127 | down | Citbismine F                                                                        | + |
| M672T488   | 2.503 | 0.007 | 2.875 | up   | CE(20:5(5Z,8Z,11Z,14Z,17Z))                                                         | + |
| M687T258   | 0.404 | 0.001 | 3.443 | down | Secoisolariciresinol 9,9'-diglucoside                                               | + |
| M687T559   | 2.377 | 0.017 | 2.823 | up   | Ceramide (d18:1/25:0)                                                               | + |
| M688T152   | 6.052 | 0.000 | 4.958 | up   | Jubanine C                                                                          | + |
| M699T411   | 0.475 | 0.031 | 2.404 | down | Erythrodiol 3-palmitate                                                             | + |
| M727T258   | 0.474 | 0.000 | 3.043 | down | Paradisins C                                                                        | + |
| M728T415   | 0.387 | 0.015 | 2.779 | down | CE(22:2(13Z,16Z))                                                                   | + |
| M773T241_2 | 2.066 | 0.013 | 2.616 | up   | Oleanolic acid 3-[glucosyl-(1->4)-xyloside]                                         | + |
| M815T414   | 0.377 | 0.002 | 3.077 | down | PE(24:0/P-18:1(11Z))                                                                | + |
| M816T414   | 0.404 | 0.003 | 2.921 | down | Sitoindoside I                                                                      | + |
| M817T414   | 0.449 | 0.002 | 2.794 | down | PE(24:0/P-18:0)                                                                     | + |
| M831T335   | 2.080 | 0.029 | 2.609 | up   | N-Monodemethyl roxithromycin                                                        | + |
| M842T429   | 0.459 | 0.020 | 2.473 | down | PA(21:0/22:0)                                                                       | + |
| M854T465   | 0.339 | 0.032 | 2.617 | down | TG(15:0/22:5(4Z,7Z,10Z,13Z,16Z)/15:0)                                               | + |
| M857T414   | 0.457 | 0.003 | 2.718 | down | Isofucosterol 3-O-[6-O-(9-Octadecenyl)-b-D-glucopyranoside]                         | + |
| M858T414   | 0.482 | 0.001 | 2.788 | down | TG(14:0/20:1(11Z)/15:0)                                                             | + |
| M878T480   | 2.356 | 0.046 | 2.545 | up   | TG(18:3(9Z,12Z,15Z)/18:1(11Z)/18:3(9Z,12Z,15Z))                                     | + |
| M883T440   | 0.371 | 0.002 | 3.031 | down | PC(o-22:0/22:3(10Z,13Z,16Z))                                                        | + |
| M886T440   | 0.465 | 0.002 | 2.790 | down | Coenzyme Q10                                                                        | + |
| M888T440   | 0.393 | 0.002 | 2.976 | down | Ubiquinol-10                                                                        | + |
| M926T440   | 0.487 | 0.000 | 2.634 | down | TG(18:1(11Z)/18:0/18:1(11Z))                                                        | + |
| M929T296   | 7.184 | 0.000 | 5.231 | up   | 3-O-Sulfogalactosylceramide (d18:1/24:1(15Z))                                       | + |
| M998T465   | 2.109 | 0.033 | 2.261 | up   | TG(22:6(4Z,7Z,10Z,13Z,16Z,19Z)/20:5(5Z,8Z,11Z,14Z,17Z)/22:6(4Z,7Z,10Z,13Z,16Z,19Z)) | + |
| M999T273   | 2.754 | 0.000 | 3.598 | up   | Ziziphin                                                                            | + |

**Table S4 Differential lipid species Cela/tMCAO in mouse brain, according to significance evaluation and VIP values**

| ID        | Fold change | p.value | VIP   | Regulated | Metabolite                                                                                                     | Ion mode |
|-----------|-------------|---------|-------|-----------|----------------------------------------------------------------------------------------------------------------|----------|
| M103T33   | 0.445       | 0.014   | 3.044 | down      | 2-Hydroxybutyric acid                                                                                          | -        |
| M173T29   | 2.086       | 0.036   | 2.503 | up        | 1-[(2,5-Dimethylphenyl)azo]-2-naphthalenol                                                                     | -        |
| M255T26   | 0.439       | 0.034   | 3.181 | down      | Dodecamethylpentasiloxane                                                                                      | -        |
| M269T189  | 0.441       | 0.018   | 2.828 | down      | 3-Oxohexadecanoic acid                                                                                         | -        |
| M345T52   | 2.926       | 0.000   | 4.979 | up        | Cortexolone                                                                                                    | -        |
| M403T43   | 2.139       | 0.000   | 3.847 | up        | 1alpha-O-Methylquassin                                                                                         | -        |
| M405T52   | 3.013       | 0.000   | 5.025 | up        | Annoglabasin C                                                                                                 | -        |
| M533T578  | 0.083       | 0.036   | 4.725 | down      | 1-Linoleoylglycerophosphocholine                                                                               | -        |
| M727T258  | 2.015       | 0.016   | 2.145 | up        | C.I. Acid Violet 49                                                                                            | -        |
| M861T497  | 0.439       | 0.033   | 2.962 | down      | PA(22:0/24:0)                                                                                                  | -        |
| M910T300  | 0.472       | 0.001   | 3.322 | down      | PS(DiMe(11,3)/DiMe(11,5))                                                                                      | -        |
| M929T313  | 0.463       | 0.003   | 2.859 | down      | PI(18:0/22:5(4Z,7Z,10Z,13Z,16Z))                                                                               | -        |
| M953T312  | 0.378       | 0.001   | 3.537 | down      | 1,2-Di-(9Z,12Z,15Z-octadecatrienoyl)-3-(Galactosyl-alpha-1-6-Galactosyl-beta-1)-glycerol                       | -        |
| M194T33   | 0.471       | 0.036   | 3.733 | down      | 4-Phenylpyridine                                                                                               | +        |
| M236T34   | 2.469       | 0.027   | 3.156 | up        | L-Aspartyl-4-phosphate                                                                                         | +        |
| M280T29_1 | 0.371       | 0.011   | 3.984 | down      | Glutamylaspartic acid                                                                                          | +        |
| M307T35   | 0.017       | 0.019   | 7.207 | down      | (1aalpha,2beta,3alpha,11calpha)-1a,2,3,11c-Tetrahydro-6,11-dimethylbenzo[6,7]phenanthro[3,4-b]oxirene-2,3-diol | +        |
| M356T241  | 0.317       | 0.014   | 3.976 | down      | Erucic acid                                                                                                    | +        |
| M449T570  | 0.488       | 0.029   | 2.713 | down      | 4alpha-Formyl-4beta-methyl-5alpha-cholesta-8,24-dien-3beta-ol                                                  | +        |

|            |       |       |       |      |                                                 |   |
|------------|-------|-------|-------|------|-------------------------------------------------|---|
| M492T242   | 8.478 | 0.049 | 3.821 | up   | N-hexacosanoylglycine                           | + |
| M561T278_1 | 0.333 | 0.045 | 3.209 | down | Cucurbitacin C                                  | + |
| M655T368   | 0.490 | 0.012 | 3.159 | down | DG(18:3(6Z,9Z,12Z)/20:5(5Z,8Z,11Z,14Z,17Z)/0:0) | + |
| M672T488   | 0.476 | 0.026 | 3.472 | down | CE(20:5(5Z,8Z,11Z,14Z,17Z))                     | + |
| M687T559   | 0.458 | 0.023 | 3.784 | down | Ceramide (d18:1/25:0)                           | + |
| M688T152   | 0.392 | 0.003 | 3.687 | down | Jubanine C                                      | + |
| M878T480   | 0.426 | 0.043 | 3.072 | down | TG(18:3(9Z,12Z,15Z)/18:1(11Z)/18:3(9Z,12Z,15Z)) | + |
| M923T294   | 0.492 | 0.001 | 3.720 | down | PS(DiMe(11,3)/DiMe(13,5))                       | + |
| M929T296   | 0.410 | 0.006 | 3.350 | down | 3-O-Sulfogalactosylceramide (d18:1/24:1(15Z))   | + |
| M941T305   | 0.463 | 0.029 | 3.261 | down | 3-O-Sulfogalactosylceramide (d18:1/26:1(17Z))   | + |

**Table S5 The enriched KEGG pathway of differential metabolites of Cela/Sham in mouse plasma**

| Pathwayname                                            | p-value  | Metabolite                                                     | Impact |
|--------------------------------------------------------|----------|----------------------------------------------------------------|--------|
| Sphingolipid metabolism                                | 4.57E-05 | Sphingomyelin;Digalactosylceramide;Glucosylceramide; Sulfatide | 0.08   |
| Arachidonic acid metabolism                            | 0.005    | 5,6-EET; Phosphatidylcholine; 14,15-DHET                       | 0.02   |
| Linoleic acid metabolism                               | 0.05     | Phosphatidylcholine                                            | 0      |
| Glycerophospholipid metabolism                         | 0.05     | Phosphatidylethanolamine; Phosphatidylcholine                  | 0.2    |
| Valine, leucine and isoleucine biosynthesis            | 0.082083 | L-Isoleucine                                                   | 0      |
| alpha-Linolenic acid metabolism                        | 0.13013  | Phosphatidylcholine                                            | 0      |
| Glycosylphosphatidylinositol (GPI)-anchor biosynthesis | 0.13945  | Phosphatidylethanolamine                                       | 0      |
| Terpenoid backbone biosynthesis                        | 0.17581  | Dimethylallyl diphosphate                                      | 0      |
| Biosynthesis of unsaturated fatty acids                | 0.32232  | (4Z,7Z,10Z,13Z,16Z,19Z)-Docosahexaenoic acid                   | 0      |
| Valine, leucine and isoleucine degradation             | 0.35138  | L-Isoleucine                                                   | 0      |
| Steroid biosynthesis                                   | 0.36546  | 3alpha,7alpha-Dihydroxy-5beta-cholestane                       | 0      |
| Primary bile acid biosynthesis                         | 0.39278  | 3alpha,7alpha-Dihydroxy-5beta-cholestane                       | 0.03   |

|                             |         |              |   |
|-----------------------------|---------|--------------|---|
| Aminoacyl-tRNA biosynthesis | 0.40602 | L-Isoleucine | 0 |
|-----------------------------|---------|--------------|---|

**Table S6 The enriched KEGG pathway of differential metabolites of Cella/Sham in mouse brain**

| Pathwayname                                            | p-value   | Metabolite                                                                                           | Impact  |
|--------------------------------------------------------|-----------|------------------------------------------------------------------------------------------------------|---------|
| Arachidonic acid metabolism                            | 0.0054649 | 5,6-EET;Phosphatidylcholine; Leukotriene A4;14,15-DHET                                               | 0.101   |
| Glycerophospholipid metabolism                         | 0.0054649 | Phosphatidylethanolamine; Phosphatidylcholine;1-Acyl-sn-glycero-3-phosphocholine; Phosphatidylserine | 0.26332 |
| Sphingolipid metabolism                                | 0.067564  | Sphingomyelin; Sulfatide                                                                             | 0       |
| Linoleic acid metabolism                               | 0.098897  | Phosphatidylcholine                                                                                  | 0       |
| Phosphonate and phosphinate metabolism                 | 0.11751   | 2-Aminoethylphosphonate                                                                              | 0       |
| Valine, leucine and isoleucine biosynthesis            | 0.15362   | L-Isoleucine                                                                                         | 0       |
| alpha-Linolenic acid metabolism                        | 0.23775   | Phosphatidylcholine                                                                                  | 0       |
| Glycosylphosphatidylinositol (GPI)-anchor biosynthesis | 0.25358   | Phosphatidylethanolamine                                                                             | 0.00399 |
| Terpenoid backbone biosynthesis                        | 0.31377   | Dimethylallyl diphosphate                                                                            | 0       |
| Fatty acid degradation                                 | 0.56031   | L-Palmitoylcarnitine                                                                                 | 0       |
| Valine, leucine and isoleucine degradation             | 0.5696    | L-Isoleucine                                                                                         | 0       |
| Tryptophan metabolism                                  | 0.5787    | 5-Hydroxykynurenamine                                                                                | 0.0139  |
| Steroid biosynthesis                                   | 0.58762   | 5-Hydroxykynurenamine                                                                                | 0       |
| Primary bile acid biosynthesis                         | 0.62149   | 3alpha,7alpha-Dihydroxy-5beta-cholestane                                                             | 0.02724 |
| Aminoacyl-tRNA biosynthesis                            | 0.6374    | L-Isoleucine                                                                                         | 0       |
| Steroid hormone biosynthesis                           | 0.80676   | Dehydroepiandrosterone sulfate                                                                       | 0       |

**Table S7 Frequency of lipid metabolites and the involved KEGG pathway**

| Metabolites                                                     | Frequency | Pathway                                                                                                                 | Synonyms in HMDB                                                |
|-----------------------------------------------------------------|-----------|-------------------------------------------------------------------------------------------------------------------------|-----------------------------------------------------------------|
| Phosphatidylcholine                                             | 18        | Glycerophospholipid metabolism;alpha-Linolenic acid metabolism;<br>Linoleic acid metabolism;Arachidonic acid metabolism | PC(14:0/18:2(9Z,12Z))                                           |
| Phosphatidylethanolamine                                        | 9         | Glycerophospholipid metabolism;Glycosylphosphatidylinositol<br>(GPI)-anchor biosynthesis                                | PE(24:0/P-18:1(11Z))                                            |
| Sulfatide                                                       | 6         | Sphingolipid metabolism                                                                                                 | 3-O-Sulfogalactosylceramide (d18:1/24:1(15Z))                   |
| L-Isoleucine                                                    | 8         | Valine, leucine and isoleucine degradation; Aminoacyl-tRNA<br>biosynthesis                                              | L-Isoleucine                                                    |
| Sphingosine                                                     | 4         | Sphingolipid metabolism                                                                                                 | Sphingosine                                                     |
| (9Z,12Z,15Z)-Octadecatrienoic acid                              | 4         | alpha-Linolenic acid metabolism; Biosynthesis of unsaturated fatty<br>acids                                             | Alpha-Linolenic acid                                            |
| Dimethylallyl diphosphate                                       | 4         | Terpenoid backbone biosynthesis                                                                                         | Dimethylallylpyrophosphate                                      |
| Cholesterol ester                                               | 3         | Steroid biosynthesis                                                                                                    | CE(20:5(5Z,8Z,11Z,14Z,17Z))                                     |
| L-Arginine                                                      | 3         | Arginine biosynthesis;Arginine and proline metabolism;Aminoacyl-<br>tRNA biosynthesis                                   | L-Arginine                                                      |
| L-Palmitoylcarnitine                                            | 3         | Fatty acid degradation                                                                                                  | L-Palmitoylcarnitine                                            |
| 5-Hydroxykynurenamine                                           | 3         | Tryptophan metabolism;Steroid biosynthesis                                                                              | 5-Hydroxykynurenamine                                           |
| 3alpha,7alpha-Dihydroxy-5beta-cholestane                        | 3         | Steroid biosynthesis;Primary bile acid biosynthesis                                                                     | 3a,7a-Dihydroxy-5b-cholestane                                   |
| N-Acylsphingosine                                               | 2         | Sphingolipid metabolism                                                                                                 | Ceramide (d18:1/25:0)                                           |
| 2-Hydroxybutanoic acid                                          | 2         | Propanoate metabolism                                                                                                   | 2-Hydroxybutyric acid                                           |
| N-Acetyl-L-aspartate                                            | 2         | Alanine, aspartate and glutamate metabolism                                                                             | N-Acetyl-L-aspartic acid                                        |
| 1-Acyl-sn-glycero-3-phosphocholine                              | 2         | Glycerophospholipid metabolism                                                                                          | 1-Linoleoylglycerophosphocholine                                |
| (1aalpha,2beta,3alpha,11calpha)-1a,2,3,11c-<br>Tetrahydro-6,11- | 2         | Metabolism of xenobiotics by cytochrome P450;Glycerophospholipid<br>metabolism                                          | (1aalpha,2beta,3alpha,11calpha)-1a,2,3,11c-<br>Tetrahydro-6,11- |

|                                                     |   |                                |                                                     |
|-----------------------------------------------------|---|--------------------------------|-----------------------------------------------------|
| dimethylbenzo[6,7]phenanthro[3,4-b]oxirene-2,3-diol |   |                                | dimethylbenzo[6,7]phenanthro[3,4-b]oxirene-2,3-diol |
| 11-Deoxycortisol                                    | 2 | Steroid hormone biosynthesis   | Cortexolone                                         |
| Lactosylceramide                                    | 2 | Sphingolipid metabolism        | Lactosylceramide (d18:1/12:0)                       |
| Pregnenolone                                        | 2 | Steroid hormone biosynthesis   | Pregnenolone                                        |
| Phosphatidylserine                                  | 2 | Glycerophospholipid metabolism | PS(18:0/22:5(7Z,10Z,13Z,16Z,19Z))                   |
| Sphingomyelin                                       | 2 | Sphingolipid metabolism        | SM(d18:1/18:0)                                      |
| 5,6-EET                                             | 2 | Arachidonic acid metabolism    | 5,6-Epoxy-8,11,14-eicosatrienoic acid               |
| 14,15-DHET                                          | 2 | Arachidonic acid metabolism    | 14,15-DiHETrE                                       |
